# Supplementary material for: Inverted perovskite solar cells with inserted cross-linked electron-blocking interlayers for performance enhancement
Source: Royal Society of Chemistry journal article supplement (doi:10.1039/c5ta01479d), 2015-01-01
Supplement: c5ta01479d1.pdf [file c5ta01479d1.pdf]

## Electronic Supporting Information

### Inverted Perovskite Solar Cells with Inserting Cross-linked Electron-Blocking Interlayer for Performance Enhancement

Hong-Jyun Jhuo, Po-Nan Yeh, Sih-Hao Liao, Yi-Lun Li, Sunil Sharma, Show-An Chen\*

#### General instrumentations

The thickness was measured by Tencor P-10 Surface Profiler. UV-vis spectra were measured using an UV-vis spectroscopy (Perkin-Elmer, Lambda 19). The XRD were collected on Rigaku Ultima IV X-ray diffractometer with Cu-K $\alpha$  radiation. The SEM images were taken on Hitachi SU8010. Photoluminescence spectra were taken by Horiba-Jobin Yvon FluoroMax-3 with the excitation wavelength of 405 nm. The current-voltage (J-V) characteristics were measured under atmosphere using a Keithley 2400 source-measure unit and an AM 1.5G solar simulator (Oriel 94021A, 150 W from Newport). The illumination intensity of 100 mW/cm<sup>2</sup> irradiation was calibrated using a KG5-filtered NREL-traceable monocrystal Si reference cell to ensure the accurate light source intensity. The external quantum efficiency (EQE) was measured using a measurement system (model QE-R, from Enli Technology Co.). Light from a 150 W xenon lamp (Oriel, U.S.A.) was focused through a monochromator under testing. EQE ( $\lambda$ ) as defined by  $EQE(\lambda) = 12400 (J_{sc}/\lambda\phi)$ ,  $\phi$  is the incident radiative flux (mW/cm<sup>2</sup>). J-V characteristics were measured in nitrogen filled glovebox and the device was encapsulated for EQE measurement in air.

#### XRD and PL quench

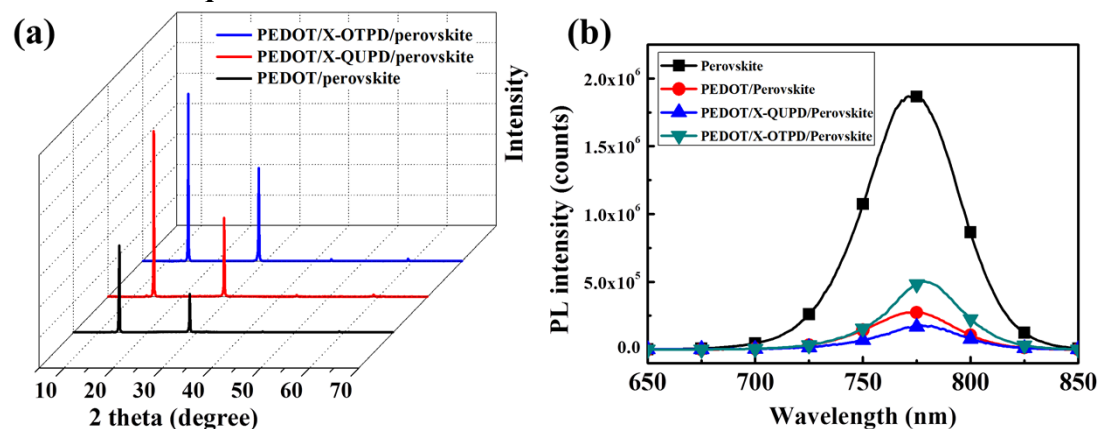

**Fig S1.** (a) XRD spectra of perovskite on glass/PEDOT:PSS and glass/PEDOT:PSS/X-QUPD or X-OTPD. (b) PL quenching effect of perovskite on glass, glass/PEDOT:PSS and glass/PEDOT:PSS/ X-QUPD or X-OTPD.

## SCLC

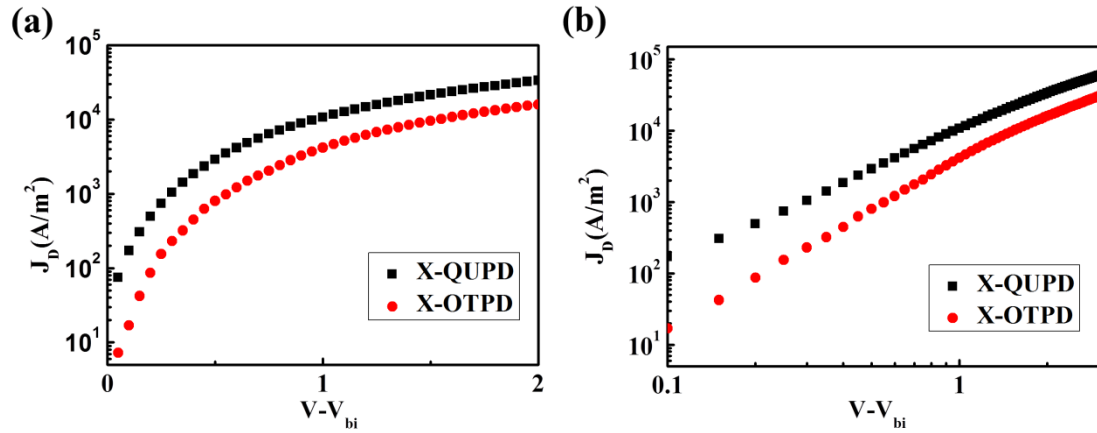

**Fig S2.** Current density versus bias voltage of the electron-only devices: (a) semi-log and (b) double-log.

## J-V characteristics of invert type perovskite solar cells under various light intensities

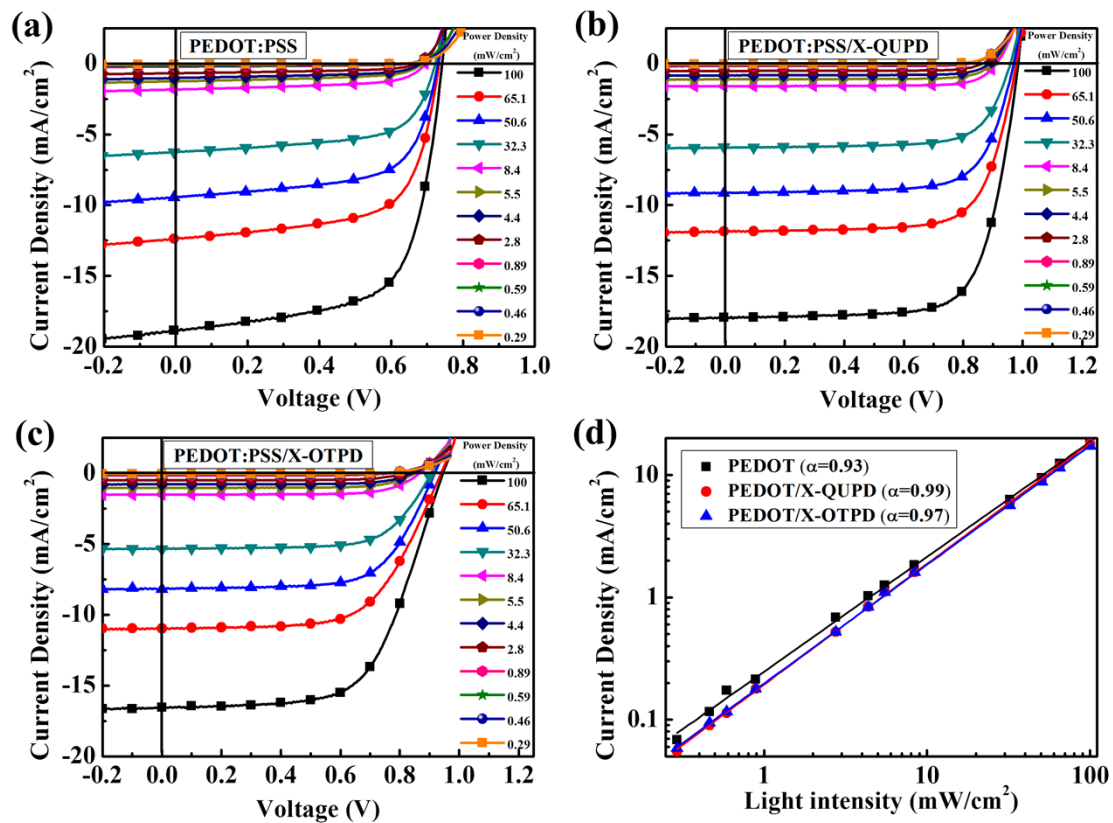

**Fig. S3.** J-V characteristics of invert type perovskite solar cells with (a) PEDOT:PSS, (b) PEDOT:PSS/X-QUPD, (c) PEDOT:PSS/X-OTPD under various light intensity ranging from 100 mW/cm<sup>2</sup> to 0.29 mW/cm<sup>2</sup>. (d) log-log plot of current density versus irradiation light intensity.

**Photovoltaic performance of the devices with various thickness of X-QUPD and X-OTPD as interlayer under AM 1.5G irradiation (100 mW/cm<sup>2</sup>)**

**Table S1.** Photovoltaic performance of the devices with various thickness of X-QUPD as interlayer under AM 1.5G irradiation (100 mW/cm<sup>2</sup>).

| X-QUPD | V <sub>oc</sub><br>[V] | J <sub>sc</sub><br>[mA/cm <sup>2</sup> ] | FF   | PCE<br>[%] | R <sub>s</sub><br>[Ωcm <sup>2</sup> ] | R <sub>sh</sub><br>[Ωcm <sup>2</sup> ] |
|--------|------------------------|------------------------------------------|------|------------|---------------------------------------|----------------------------------------|
| 2 nm   | 0.93                   | 18.30                                    | 0.73 | 12.42      | 6.94                                  | 1876                                   |
| 4 nm   | 0.99                   | 18.07                                    | 0.73 | 13.06      | 7.06                                  | 2096                                   |
| 7 nm   | 0.98                   | 17.66                                    | 0.67 | 11.67      | 10.07                                 | 1497                                   |
| 10 nm  | 0.98                   | 17.33                                    | 0.56 | 9.51       | 30.63                                 | 930                                    |
| 15 nm  | 0.98                   | 16.81                                    | 0.46 | 7.58       | 53.02                                 | 252                                    |

**Table S2.** Photovoltaic performance of the devices with various thickness of X-OTPD as interlayer under AM 1.5G irradiation (100 mW/cm<sup>2</sup>).

| X-OTPD | V <sub>oc</sub><br>[V] | J <sub>sc</sub><br>[mA/cm <sup>2</sup> ] | FF   | PCE<br>[%] | R <sub>s</sub><br>[Ωcm <sup>2</sup> ] | R <sub>sh</sub><br>[Ωcm <sup>2</sup> ] |
|--------|------------------------|------------------------------------------|------|------------|---------------------------------------|----------------------------------------|
| 2 nm   | 0.91                   | 17.68                                    | 0.65 | 10.46      | 9.66                                  | 991                                    |
| 4 nm   | 0.95                   | 17.34                                    | 0.66 | 10.87      | 10.42                                 | 1590                                   |
| 6 nm   | 0.96                   | 16.44                                    | 0.57 | 9.00       | 27.26                                 | 629                                    |
| 9 nm   | 0.96                   | 15.56                                    | 0.48 | 7.17       | 33.49                                 | 312                                    |
| 11 nm  | 0.96                   | 13.55                                    | 0.44 | 5.72       | 41.2                                  | 298                                    |
